# Supplementary material for: Air Quality Monitoring Using Low-Cost Sensors in Urban Areas of Jodhpur, Rajasthan
Source: MDPI journal article supplement (doi:10.3390/ijerph21050623), 2024-05-14
Supplement: s1 [file s1]

**Table S1.** Monthly average PM<sub>2.5</sub> values at all sites (Where i=indoor, o=outdoor, 1=first house, 2=second house).

| Location             |      | 2022      |           |           |              |           |            | 2023       |            |               |              |       |              |         |         | Mean ±             |
|----------------------|------|-----------|-----------|-----------|--------------|-----------|------------|------------|------------|---------------|--------------|-------|--------------|---------|---------|--------------------|
|                      | Site | Jul       | Aug       | Sep       | Oct          | Nov       | Dec        | Jan        | Feb        | Mar           | Apr          | May   | Jun          | Minimum | Maximum | Standard Deviation |
| Industrial area      | 1i   | 54.8<br>3 | 46.5<br>3 | 55.5<br>7 | 72.6<br>1    | 106.<br>5 | 112.6<br>1 | 113.1<br>4 | 104.6<br>4 | 96.43         | 71.0<br>1    | 53.16 | 67.0<br>8    | 46.53   | 113.14  | 79.51±25.42        |
|                      | 1o   | 47.8<br>3 | 33.3<br>5 |           | 59.2<br>4    | 94.8<br>7 | 144.6<br>2 | 102.3<br>5 | 104.0<br>6 | 96.65         | 58.9<br>3    | 48.73 | 57.9<br>9    | 33.35   | 144.62  | 74.34±33.38        |
|                      | 2i   | 52.7<br>9 | 32.5<br>9 | 43.7<br>6 | 48.9<br>9    | 83.8<br>3 | 108.8<br>3 | 91.64      | 84.46      | 75.65         | 47.0<br>5    | 51.57 | 63.0<br>5    | 32.59   | 108.83  | 65.35±23.14        |
|                      | 2o   | 58.9<br>1 | 31.0<br>9 | 37.6<br>8 | 42.6<br>6    | 80.7<br>3 | 103.0<br>9 | 79.16      | 68.19      | 78.5          | 47.1<br>6    | 45.03 | 49.4<br>3    | 31.09   | 103.09  | 60.14±21.74        |
|                      |      | 40.9<br>5 | 33.5<br>4 | 50.4<br>1 |              | 73.0<br>2 | 99.62      | 97.9       | 99         | 50.38         | 65.8<br>7    | 43.5  | 67.4<br>2    | 33.54   | 99.62   | 64.95±23.39        |
| Commercial area      | 1o   | 72.8<br>3 | 28.9<br>7 | 39.5<br>1 | 38.5<br>7    | 71.9<br>7 | 104.7<br>5 | 98.13      | 84.52      | 87.58         | 67.1<br>1    | 38.11 | 77.9<br>9    | 28.97   | 104.75  | 67.50±25.49        |
|                      | 2i   | 33.0<br>9 | 44.1<br>4 | 40.7<br>9 | 90.1<br>7    | 197.<br>6 | 136.8<br>9 |            |            |               | 56.1<br>4    |       | 53.1<br>6    | 33.09   | 197.55  | 83.26±49.00        |
|                      | 2o   | 29.5<br>2 | 45.9<br>6 |           | 76.0<br>6    | 101.<br>6 | 100.9<br>1 | 90.19      | 73.93      | 56.36         | 43.0<br>5    | 49.99 | 36.7<br>8    | 29.52   | 101.64  | 64.04±25.80        |
|                      | 1i   | 50.0<br>8 | 51.8<br>8 | 76.7<br>7 | 162.<br>6    | 214.<br>7 | 194.6<br>7 | 170.7<br>3 | 187.6<br>1 | 108.3<br>7    | 85.4<br>4    | 70.52 | 72.9<br>2    | 50.08   | 214.73  | 120.53±60.98       |
|                      | 1o   | 38.8<br>8 | 49.2<br>8 | 62.2<br>7 | 135.<br>1    | 155.<br>1 | 101.6<br>1 | 103.5<br>4 | 116.0<br>4 | 72.09         | 84.7<br>5    | 68.62 | 63.6<br>1    | 38.88   | 155.10  | 87.58±35.34        |
| Slum area            | 2i   | 42.9<br>8 | 46.6<br>3 | 57.1<br>1 | 111.<br>8    | 140.<br>6 | 133.1<br>1 | 136.2<br>2 | 147.3<br>3 | 102.5         | 62.1<br>62.1 | 70.51 | 66.2<br>7    | 42.98   | 147.33  | 93.10±39.61        |
|                      | 2o   | 40.8<br>8 | 49.5<br>3 | 56.4<br>8 | 115.<br>3    | 162.<br>6 | 132.3<br>6 | 127.3<br>9 | 119.9<br>7 | 58.3<br>73.83 | 58.3<br>2    | 59.88 | 61.9<br>4    | 40.88   | 162.58  | 88.20±40.55        |
|                      |      | 48.4<br>4 | 45.1<br>3 |           | 79.3<br>6    | 75.0<br>4 | 70.07      | 82.69      | 76.56      | 71.32         | 75.0<br>1    | 44.7  | 45.7<br>56   | 44.7    | 82.69   | 64.35±14.68        |
|                      | 1o   | 29.9<br>5 | 36.0<br>5 | 36.3<br>3 | 99.3<br>71.6 | 99.3<br>7 | 83.42      | 78.95      | 83.22      | 50.66         | 46.1<br>1    | 58.52 | 45.7<br>1    | 29.95   | 99.37   | 59.99±22.67        |
|                      | 2i   | 32.1<br>2 | 30.7<br>9 | 34.2<br>5 | 59.4<br>4    | 71.8<br>3 | 66.63      | 75.36      | 80.61      | 54.65         | 49.1<br>3    | 47.08 | 69.1<br>47.5 | 30.79   | 80.61   | 54.12±17.04        |
| High-income Colony   | 2o   | 29.7<br>9 | 38.5<br>6 | 40.1<br>4 | 80.2<br>9    | 114.<br>4 | 103.1<br>3 | 106.8<br>8 | 97.37      | 55.37         | 53.1<br>1    | 51.53 | 69.1<br>9    | 29.79   | 114.36  | 69.98±29.57        |
|                      | 1i   | 63.4<br>1 | 80.3<br>2 | 58.3<br>5 | 81.1<br>8    | 65.0<br>7 | 80.48      | 88.02      | 96.77      | 64.64         | 48.4<br>1    | 49.28 | 59.6<br>2    | 48.41   | 96.77   | 69.63±15.42        |
|                      | 1o   | 40.0<br>9 | 35.5<br>9 |           | 75.8<br>4    | 99.3<br>3 | 94.05      | 95.78      | 83.6       | 53.35         | 51.3<br>9    | 42.04 | 49.3<br>7    | 35.59   | 99.33   | 63.15±24.74        |
|                      | 2i   | 82.8<br>8 | 74.5<br>9 | 56.2<br>3 | 85.7<br>8    | 84.4<br>4 | 76.28      | 95.27      | 74.38      | 63.46         | 61.5<br>1    | 50.15 | 52.6<br>3    | 50.15   | 95.27   | 71.47±14.51        |
|                      | 2o   | 31.5<br>5 | 33.2<br>8 | 32.2<br>2 | 75.5<br>2    | 90.9<br>4 | 83.67      | 93.08      | 78.85      | 50.03         | 48.3<br>3    | 57.32 | 42.5<br>2    | 31.55   | 93.08   | 59.78±23.45        |
| Middle-income Colony |      | 69.8<br>1 | 78.3<br>4 | 66.4<br>7 | 77.6<br>1    |           | 93.2       | 82.28      | 95.92      | 92.81         | 73.1<br>5    |       | 45.2<br>3    | 45.23   | 95.92   | 75.72±14.88        |
|                      | 1o   | 34.3<br>8 | 35.5<br>4 | 44.7<br>4 | 65.8<br>2    | 92.4<br>7 | 83.4       | 88.28      | 75.75      | 53.69         | 65.6<br>6    | 57.81 | 44.9<br>1    | 34.38   | 92.47   | 63.13±20.27        |
|                      | 2i   | 45.4<br>6 | 37.1<br>7 | 37.7<br>9 | 38.2<br>6    | 65.8<br>9 | 85.35      | 73.02      | 68.51      | 70.42         | 45.3<br>45.3 | 46.51 | 70.6<br>8    | 37.17   | 85.35   | 57.03±16.88        |
|                      | 2o   | 43.8<br>4 | 27.8<br>7 | 28.6<br>2 | 34.8<br>2    | 70.3<br>5 | 84.2       | 74.28      | 71.5       | 68.3          | 44.8<br>9    | 46.54 | 65.3<br>2    | 27.87   | 84.20   | 55.04±19.43        |
|                      |      |           |           |           |              |           |            |            |            |               |              |       |              |         |         |                    |

**Table S2.** Monthly average Temperature values at all sites (Where i=indoor, o=outdoor, 1=first house, 2=second house).

| Location        | Site | 2022  |       |       |       |       |       | 2023  |       |       |       |       |       | Minimum | Maximum | Mean ± Standard Deviation |
|-----------------|------|-------|-------|-------|-------|-------|-------|-------|-------|-------|-------|-------|-------|---------|---------|---------------------------|
|                 |      | Jul   | Aug   | Sep   | Oct   | Nov   | Dec   | Jan   | Feb   | Mar   | Apr   | May   | Jun   |         |         |                           |
| Industrial area | 1i   | 29.15 | 28.21 | 29.49 | 28.2  | 24.78 | 19.7  | 18.24 | 24.1  | 27.57 | 30.09 | 30.78 | 30.93 | 18.24   | 30.93   | 26.77±4.22                |
|                 | 1o   | 30.12 | 28.62 | 30.56 | 28.58 | 22.92 | 21.03 | 18.53 | 22.78 | 26.71 | 30.78 | 32.9  | 35.29 | 18.53   | 35.29   | 27.40±5.09                |

|                      |    |           |           |           |           |           |           |       |       |       |       |       |       |       |       |              |
|----------------------|----|-----------|-----------|-----------|-----------|-----------|-----------|-------|-------|-------|-------|-------|-------|-------|-------|--------------|
| Commercial area      | 2i | 30.4<br>6 | 30.1<br>5 | 32.1<br>8 | 30.4<br>2 | 25.7<br>5 | 21.4<br>6 | 18.97 | 24    | 28.71 | 32.23 | 34.26 | 32.87 | 18.97 | 34.26 | 28.45±4.84   |
|                      | 2o | 29.5<br>7 | 29.5<br>7 | 32.0<br>3 | 30.5<br>4 | 25.3<br>2 | 20.6<br>9 | 17.95 | 25.18 | 28.3  | 31.92 | 34.12 | 34.07 | 17.95 | 34.12 | 28.27 ±5.10  |
|                      | 1i | 28.1<br>5 | 29.2<br>9 | 30.8<br>3 | 30.2      | 27.2      | 22.5<br>8 | 19.3  | 26.46 | 28.66 | 30.26 | 30.65 | 31.31 | 19.3  | 31.31 | 27.90 ±3.64  |
|                      | 1o | 29.9<br>4 | 29.0<br>2 | 32.0<br>7 | 30.9<br>5 | 27.0<br>1 | 22.3<br>6 | 19.54 | 22.77 | 27.76 | 32.5  | 33.26 | 31.84 | 19.54 | 33.26 | 28.25 ±4.51  |
|                      | 2i | 29.7<br>1 | 28.6      | 29.8<br>2 | 27.5      | 25.3      | 20.9<br>7 | 17.99 | 22.69 | 26.15 | 27.7  | 30.32 | 30.31 | 17.99 | 30.32 | 26.42 ±4.00  |
| Slum area            | 2o | 30.3<br>6 | 28.9<br>3 |           |           | 20.6<br>7 | 17.7<br>6 | 22.89 | 25.84 | 28.62 | 32.95 | 31.29 | 31.78 | 17.76 | 32.95 | 27.10 ±5.14  |
|                      | 1i | 30.2<br>5 | 29.2<br>3 | 31.4<br>4 | 30.2<br>9 | 26.4<br>7 | 22.1<br>4 | 18.99 | 24.32 | 27.21 | 30.1  | 31.97 | 32.27 | 18.99 | 32.27 | 27.89 ±4.2   |
|                      | 1o | 29.3<br>7 | 28.4<br>8 | 30.8<br>6 | 30.1<br>6 | 25.6<br>2 | 21.3<br>4 | 18.03 | 24.92 | 27.17 | 30.92 | 32.62 | 33.3  | 18.03 | 33.3  | 27.73 ±4.59  |
|                      | 2i | 28.5<br>3 | 28.3<br>2 | 30.1<br>2 | 29.9<br>5 | 26.8<br>1 | 22.7<br>8 | 19.6  | 25    | 27.92 | 30.23 | 33.43 | 31.25 | 19.6  | 33.43 | 27.823 ±3.83 |
|                      | 2o | 29.3<br>1 | 28.9<br>1 | 31.4<br>1 | 30.2<br>8 | 26.2      | 21.8<br>2 | 18.68 | 25.01 | 27.53 | 31.3  | 32.73 | 32.81 | 18.68 | 32.81 | 28±4.4       |
| High-income Colony   | 1i | 29.5      | 28.9<br>5 | 30.0<br>2 | 29.1<br>4 | 25.6<br>1 | 20.6<br>6 | 17.73 | 22.42 | 26.77 | 29.48 | 31.29 | 30.01 | 17.73 | 31.29 | 26.8±4.33    |
|                      | 1o | 28.5<br>4 | 27.6<br>6 | 29.9<br>2 | 28.3<br>9 | 24        | 19.9<br>6 | 18.15 | 23.06 | 25.55 | 29.48 | 29.89 | 32.85 | 18.15 | 32.85 | 26.45±4.4    |
|                      | 2i | 30.1<br>3 | 29.2<br>4 | 31.4<br>1 | 30.7      | 27.3<br>3 | 23.2<br>8 | 20.46 | 24.36 | 28.58 | 31.5  | 32.12 | 31.82 | 20.46 | 32.12 | 28.41±3.81   |
|                      | 2o | 28.6<br>8 | 28.5<br>6 | 30.9<br>5 | 30.2<br>6 | 25.6      | 21.6<br>6 | 18.32 | 24.58 | 27    | 31.27 | 31.68 | 31.74 | 18.32 | 31.74 | 27.53±4.29   |
| Middle-income Colony | 1i | 27.1<br>8 | 25.8<br>8 | 26.9<br>5 | 26.6<br>6 | 25.5<br>5 | 23.4<br>2 | 20.69 | 23.49 | 27.1  | 28.29 | 28.79 | 28.14 | 20.69 | 28.79 | 26.01±2.39   |
|                      | 1o | 28.9<br>5 | 28.4<br>7 | 30.1<br>4 | 28.1<br>1 | 23.8<br>7 | 20.0<br>5 | 16.54 | 22.83 | 25.65 | 29.51 | 30.33 | 31.1  | 16.54 | 31.1  | 26.3±4.59    |
|                      | 2i | 28.5<br>5 | 28.3<br>8 | 29.1<br>5 | 29.2<br>7 | 27.8<br>2 | 23.8<br>3 | 21.51 | 24.92 | 28.03 | 30.14 | 29.72 | 29.68 | 21.51 | 30.14 | 27.58±2.71   |
|                      | 2o | 30.3<br>5 | 28.6<br>4 | 31.6<br>9 | 32.0<br>7 | 28.8<br>2 | 23.9<br>2 | 20.88 | 27.33 | 29.09 | 31.56 | 32.38 | 31.22 | 20.88 | 32.38 | 29.00±3.52   |
| Low-income Colony    | 1i | 29.7<br>2 | 28.8<br>7 | 30.1<br>3 | 27.6<br>8 | 23.9<br>3 | 19.6<br>8 | 17.36 | 21.8  | 26.55 | 29.22 | 31.04 | 31.89 | 17.36 | 31.89 | 26.49±4.73   |
|                      | 1o | 30.3<br>8 | 29.2<br>5 | 30.9      | 28.1<br>1 | 24.9<br>3 | 18.3      | 15.88 | 22.67 | 25.82 | 30.75 | 35.67 | 33.27 | 15.88 | 35.67 | 27.16±5.92   |
|                      | 2i | 30.5<br>8 | 29.6<br>4 | 31.5<br>6 | 29.8<br>7 | 24.0<br>5 | 20.7<br>6 | 19.32 | 22.83 | 27.32 | 28.31 | 31.14 | 32.4  | 19.32 | 32.4  | 27.32±4.47   |
|                      | 2o | 30.1<br>9 | 29.3<br>1 | 30.4<br>8 | 27.6<br>8 | 24.9<br>4 | 19.9<br>9 | 16.54 | 20.48 | 24.65 | 28.3  | 31.48 | 32.51 | 16.54 | 32.51 | 26.38±5.1    |

**Table S3.** Monthly average Humidity values at all sites (Where i=indoor, o=outdoor, 1=first house, 2=second house).

| Location        | Site | 2022      |           |           |           |           |           | 2023      |           |           |           |           |           | Minimum | Maximum | Mean ± Standard Deviation |
|-----------------|------|-----------|-----------|-----------|-----------|-----------|-----------|-----------|-----------|-----------|-----------|-----------|-----------|---------|---------|---------------------------|
|                 |      | Jul       | Aug       | Sep       | Oct       | Nov       | Dec       | Jan       | Feb       | Mar       | Apr       | May       | Jun       |         |         |                           |
| Industrial area | 1i   | 77.7<br>5 | 81.4<br>4 | 70.4<br>6 | 50.8<br>3 | 47.2<br>1 | 46.9<br>9 | 53.9      | 50.7<br>6 | 48.8<br>9 | 43.1<br>2 | 49.2<br>1 | 58.9<br>5 | 43.12   | 81.44   | 56.63±12.8<br>4           |
|                 | 1o   | 76.8<br>2 | 79.9<br>9 | 62.5<br>2 | 43.5<br>9 | 44.1<br>6 | 42.6<br>5 | 51.2<br>6 | 38.0<br>1 | 40.8<br>2 | 32.3<br>2 | 33.7<br>4 | 56.3<br>8 | 32.32   | 79.99   | 50.19±15.8<br>2           |
|                 | 2i   | 72.2      | 76.8<br>9 | 62.5<br>1 | 43.6<br>9 | 42.7<br>9 | 40.6<br>1 | 43.8<br>2 | 44.2<br>4 | 42.3<br>5 | 34.8<br>9 | 43.9<br>2 | 54.8<br>2 | 34.89   | 76.89   | 50.23±13.3<br>8           |

|                      |    |           |           |           |           |           |           |           |           |           |           |           |           |       |       |                 |
|----------------------|----|-----------|-----------|-----------|-----------|-----------|-----------|-----------|-----------|-----------|-----------|-----------|-----------|-------|-------|-----------------|
| Commercial area      | 2o | 75.4<br>1 | 78.1      | 63.2<br>4 | 44.4<br>5 | 41.5<br>1 | 40.9<br>6 | 46.8<br>2 | 42.7<br>5 | 42.4<br>4 | 34.9<br>2 | 45.8<br>6 | 54.2<br>1 | 34.92 | 78.1  | 50.89±14.0<br>4 |
|                      | 1i | 81.1<br>1 | 77.7<br>9 | 67.7<br>4 | 50.5<br>2 | 37.7<br>2 | 39.2      | 45.3<br>3 | 34.1<br>7 | 36.9<br>5 | 37.0<br>2 | 49.1<br>3 | 60.1<br>1 | 34.17 | 81.11 | 51.4±16.55      |
|                      | 1o | 78.8      | 77.7<br>2 | 60.7<br>5 | 41.2<br>6 | 36        | 37.7      | 43.9<br>2 | 44.4<br>9 | 43.4      | 30.9<br>1 | 43.2<br>1 | 59.0<br>5 | 30.91 | 78.8  | 49.77±15.7<br>8 |
|                      | 2i | 80.8<br>9 | 85.2<br>2 | 70.8<br>5 | 51.6<br>2 | 51.8      | 47.5<br>1 | 49.7      | 49.0<br>4 | 47.1<br>1 | 46.2<br>2 | 49.6<br>1 | 67.9<br>2 | 46.22 | 85.22 | 58.12±14.1<br>2 |
|                      | 2o | 77.3      | 83.4<br>2 | 22.9      | 24.4<br>5 | 31.0<br>4 | 44.0<br>8 | 38.5<br>6 | 42.9<br>9 | 34.9<br>8 | 41.1<br>6 | 62.5<br>5 | 43.9<br>3 | 22.9  | 83.42 | 45.61±19.2<br>9 |
| Slum area            | 1i | 75.8<br>8 | 78.7      | 62.3<br>9 | 42.7<br>4 | 39.2<br>5 | 39        | 47.2<br>5 | 42.3<br>4 | 43.1<br>5 | 37.1<br>3 | 45.3<br>1 | 59.6<br>1 | 37.13 | 78.7  | 51.06±14.5<br>1 |
|                      | 1o | 78.3<br>1 | 81.5<br>4 | 63.6<br>7 | 41.9<br>1 | 38.1<br>6 | 39.1<br>2 | 47.0<br>5 | 38.0<br>6 | 41.3<br>7 | 33.8<br>8 | 45.1<br>7 | 54.8<br>2 | 33.88 | 81.54 | 50.26±16.0<br>6 |
|                      | 2i | 85.7<br>3 | 87.4<br>9 | 71.6<br>5 | 47.6<br>7 | 38.8<br>2 | 38.9<br>9 | 45.7<br>2 | 43.3      | 41.4<br>3 | 40.1<br>3 | 45.6<br>4 | 66.0<br>3 | 38.82 | 87.49 | 54.38±18.3      |
|                      | 2o | 82.6<br>4 | 84.6<br>8 | 69.2<br>3 | 44.1<br>7 | 42.2<br>4 | 41.9<br>9 | 50.5      | 40.0<br>2 | 42.9<br>8 | 38.1<br>1 | 49.3<br>3 | 61.2<br>4 | 38.11 | 84.68 | 53.93±16.5<br>9 |
| High-income Colony   | 1i | 82.6<br>1 | 83        | 70.9<br>2 | 48.9<br>4 | 47.4<br>2 | 48.6<br>5 | 51.8<br>6 | 54.4<br>3 | 45.7<br>6 | 40.8<br>3 | 46.1<br>8 | 69.9<br>2 | 40.83 | 83    | 57.54±14.9<br>3 |
|                      | 1o | 82.9<br>4 | 86.3<br>2 | 65.7<br>2 | 42.4<br>2 | 39.0<br>9 | 40.0<br>9 | 54.7<br>3 | 38.7<br>9 | 43.1<br>1 | 32.9<br>4 | 56.8<br>2 | 53.7<br>8 | 32.94 | 86.32 | 53.06±17.4<br>8 |
|                      | 2i | 75.8<br>8 | 78.9<br>7 | 60.8<br>1 | 40.3<br>4 | 35.5<br>9 | 36.2<br>6 | 42.9<br>4 | 41.1<br>8 | 40.9<br>5 | 32.9<br>6 | 43.6<br>1 | 59.7<br>2 | 32.96 | 78.97 | 49.1±15.79      |
|                      | 2o | 80.7<br>7 | 80.6<br>7 | 62.9      | 41.7<br>2 | 37.6<br>7 | 38.1<br>2 | 45.5<br>7 | 37.7<br>6 | 43.2      | 34.4<br>3 | 50.0<br>9 | 47.5<br>7 | 34.43 | 80.77 | 50.04±16.1<br>8 |
| Middle-income Colony | 1i | 66.8<br>8 | 67.4<br>7 | 63.3<br>9 | 56.6<br>8 | 54.1<br>2 | 54.0<br>1 | 57.7<br>4 | 64.6<br>8 | 63.4<br>3 | 61.3<br>7 | 61.7<br>7 | 61.0<br>5 | 54.01 | 67.47 | 61.05±4.55      |
|                      | 1o | 71.1<br>3 | 80.6<br>7 | 63.3<br>8 | 42.4<br>6 | 37.7<br>2 | 39.5<br>3 | 45.3<br>9 | 37.4<br>9 | 43.3<br>7 | 32.9<br>2 | 40.3<br>2 | 44.2<br>2 | 32.92 | 80.67 | 48.22±15.0<br>3 |
|                      | 2i | 75.1<br>6 | 79.0<br>6 | 66.9<br>4 | 52.8<br>8 | 45.5<br>1 | 43.0<br>2 | 45.0<br>3 | 48.0<br>5 | 48.4<br>6 | 43.6<br>1 | 50.5<br>5 | 58.5<br>8 | 43.02 | 79.06 | 54.74±12.5      |
|                      | 2o | 74.9<br>6 | 80.7<br>6 | 56.8<br>7 | 34.7<br>4 | 29        | 29.8<br>7 | 35.3<br>1 | 28.9<br>6 | 33.8<br>9 | 28.3<br>9 | 40.7      | 51.0<br>9 | 28.39 | 80.76 | 43.71±18.3<br>2 |
| Low-income Colony    | 1i | 77.7<br>5 | 81.4<br>4 | 70.4<br>6 | 50.8<br>3 | 47.2<br>1 | 46.9<br>9 | 53.9      | 50.7<br>6 | 48.8<br>9 | 43.1<br>2 | 49.2<br>1 | 58.9<br>5 | 43.12 | 81.44 | 56.63±12.8<br>4 |
|                      | 1o | 76.8<br>2 | 79.9<br>9 | 62.5<br>2 | 43.5<br>9 | 44.1<br>6 | 42.6<br>5 | 51.2<br>6 | 38.0<br>1 | 40.8<br>2 | 32.3<br>2 | 33.7<br>4 | 56.3<br>8 | 32.32 | 79.99 | 50.19±15.8<br>2 |
|                      | 2i | 72.2      | 76.8<br>9 | 62.5<br>1 | 43.6<br>9 | 42.7<br>9 | 40.6<br>1 | 43.8<br>2 | 44.2<br>4 | 42.3<br>5 | 34.8<br>9 | 43.9<br>2 | 54.8<br>2 | 34.89 | 76.89 | 50.23±13.3<br>8 |
|                      | 2o | 75.4<br>1 | 78.1      | 63.2<br>4 | 44.4<br>5 | 41.5<br>1 | 40.9<br>6 | 46.8<br>2 | 42.7<br>5 | 42.4<br>4 | 34.9<br>2 | 45.8<br>6 | 54.2<br>1 | 34.92 | 78.1  | 50.89±14.0<br>4 |

**Table S4.** Monthly Month-wise Indoor CO<sub>2</sub> values at all sites (Where i=indoor, o=outdoor, 1=first house, 2=second house).

| Location        | Site | 2022  |       |       |     |       |       | 2023 |       |       |       |       |       | Minimum | Maximum | Mean ± Standard Deviation |
|-----------------|------|-------|-------|-------|-----|-------|-------|------|-------|-------|-------|-------|-------|---------|---------|---------------------------|
|                 |      | Jul   | Aug   | Sep   | Oct | Nov   | Dec   | Jan  | Feb   | Mar   | Apr   | May   | Jun   |         |         |                           |
| Industrial area | 1i   | 611.7 | 731.4 | 645   | 590 | 690.6 | 482.7 | 735  | 722   | 530.1 | 576.3 | 648.1 | 634.4 | 482.7   | 735     | 633.09±80.01              |
|                 | 1o   | 424.9 | 436.1 | 446.4 | 451 | 455.2 | 872.2 | 835  | 447.2 | 434.2 | 426.2 | 429.9 | 410.5 | 410.5   | 872.2   | 505.78±163.24             |
|                 | 2i   | 457.7 | 474   | 478.2 | 525 | 662.7 | 661.7 | 648  | 565.9 | 562.6 | 483.2 | 446.6 | 446   | 446     | 662.7   | 534.33±84.38              |
|                 | 2o   | 412.9 | 415.9 | 421.7 | 428 | 436.7 | 420.8 | 416  | 438.6 | 420.5 | 414.2 | 427.7 | 414.1 | 412.9   | 438.6   | 422.28±8.74               |
| Commercial area | 1i   | 507.9 | 530.4 | 511.4 | 539 | 580.4 | 574.5 | 512  | 453.3 | 462.9 | 526.7 | 515.3 | 604.3 | 453.3   | 604.3   | 526.48±44.46              |
|                 | 1o   | 417.8 | 432.7 | 420.8 | 446 | 463.4 | 465.4 | 512  | 638.4 | 494.9 | 425.4 | 425.3 | 421.8 | 417.8   | 638.4   | 463.68±63.08              |

|                      |    |           |            |           |          |           |           |          |            |           |            |           |            |       |        |                     |
|----------------------|----|-----------|------------|-----------|----------|-----------|-----------|----------|------------|-----------|------------|-----------|------------|-------|--------|---------------------|
|                      | 2i | 470.<br>3 | 476.4      |           |          |           |           | ###<br># | 740.5      | 603.<br>6 | 536.6      | 537.<br>3 | 651.1      | 470.3 | 4931.2 | 1118.38±<br>1543.28 |
|                      | 2o | 419.<br>8 | 520        |           |          | 478.<br>5 | 417.<br>8 | 437      | 424.1      | 422.<br>7 | 425.3      | 423.<br>1 | 450.5      | 417.8 | 520    | 441.84±<br>33.21    |
| Slum area            | 1i | 454.<br>1 | 464.8      | 468.<br>5 | 496      | 518.<br>6 | 534.<br>3 | 549      | 583.3      | 538.<br>6 | 494.4      | 472.<br>8 | 493.1      | 454.1 | 583.3  | 505.59±<br>39.49    |
|                      | 1o | 426.<br>2 | 423.9      | 418.<br>2 | 443      | 463.<br>4 | 445.<br>3 | 436      | 458        | 434.<br>3 | 423        | 432.<br>1 | 420.2      | 418.2 | 463.4  | 435.23±<br>14.62    |
|                      | 2i | 416.<br>9 | 475.6      | 441.<br>8 | 456      | 487.<br>9 | 545.<br>6 | 467      | 574.8      | 483       | 455.9      | 447.<br>5 | 471.3      | 416.9 | 574.8  | 476.93±<br>43.88    |
|                      | 2o | 414.<br>8 | 420.7      | 425.<br>9 | 449      | 477.<br>5 | 435       | 426      | 461        | 431.<br>8 | 424.5      | 426.<br>6 | 416.6      | 414.8 | 477.5  | 434.08±<br>19.02    |
| High-income Colony   | 1i | 475       | 522.2      | 512.<br>4 | 703      | 1173      | 1046      | 926      | 1280       | 982.<br>6 | 685.9      | 437.<br>4 | 466.9      | 437.4 | 1280   | 767.47±<br>301.05   |
|                      | 1o | 402.<br>6 | 409        | 410.<br>7 | 419      | 429.<br>6 | 468.<br>3 | 884      | 432.4      | 414.<br>3 | 408.6      | 489.<br>9 | 452.1      | 402.6 | 883.9  | 468.37±<br>133.59   |
|                      | 2i | 433       | 444.9      | 443.<br>9 | 476      | 508.<br>5 | 548.<br>3 | 587      | 570.3      | 561.<br>3 | 481.3      | 494.<br>8 | 442        | 433   | 586.9  | 499.26±<br>55.3     |
|                      | 2o | 405.<br>6 | 410.8      | 410       | 425      | 439.<br>9 | 422.<br>2 | 412      | 437.4      | 422.<br>4 | 419.1      | 420.<br>5 | 412.9      | 405.6 | 439.9  | 419.81±<br>10.68    |
| Middle-income Colony | 1i | 1184      | 1461.<br>8 | 1210      | 129<br>4 | 1105      | 946.<br>9 | 797      | 1047.<br>1 | 970.<br>5 | 1054.<br>6 | 1027      | 1303.<br>9 | 796.6 | 1461.8 | 1116.88±<br>183.03  |
|                      | 1o | 876.<br>9 | 409.4      | 414.<br>9 | 422      | 435.<br>4 | 430.<br>2 | 413      | 445.3      | 422.<br>1 | 459.2      | 422.<br>8 | 437.4      | 409.4 | 876.9  | 465.78±<br>130.26   |
|                      | 2i | 591.<br>5 | 623.3      | 620.<br>3 | 604      | 568.<br>4 | 569.<br>6 | 626      | 750.4      | 670.<br>9 | 659.2      | 642.<br>8 | 587        | 568.4 | 750.4  | 626.11±<br>50.99    |
|                      | 2o | 414.<br>3 | 415.7      | 407.<br>5 | 418      | 424.<br>5 | 416.<br>6 | 415      | 428.6      | 419.<br>3 | 411.1      | 416       | 411.8      | 407.5 | 428.6  | 416.5± 5.72         |
| Low-income Colony    | 1i | 564.<br>4 | 547.4      | 561.<br>1 | 545      | 605.<br>4 | 598.<br>5 | 671      | 700.4      | 689.<br>8 | 674.1      | 528.<br>8 | 492.5      | 492.5 | 700.4  | 598.25±<br>69.99    |
|                      | 1o | 413       | 412        | 417.<br>5 | 425      | 444.<br>4 | 417.<br>6 | 417      | 432.3      | 417.<br>2 | 418.5      | 453.<br>1 | 434.3      | 412   | 453.1  | 425.12±<br>13.16    |
|                      | 2i | 485.<br>1 | 516.8      | 503.<br>6 | 500      | 497.<br>8 | 518.<br>9 | 559      | 581.2      | 561.<br>3 | 412.2      | 418.<br>3 | 499.8      | 412.2 | 581.2  | 504.46±<br>51.19    |
|                      | 2o | 408.<br>6 | 414.1      | 418.<br>5 | 429      | 530.<br>7 | 473.<br>9 | 417      | 435        | 419.<br>6 | 412.1      | 519.<br>9 | 453.3      | 408.6 | 530.7  | 444.23±<br>42.37    |

**Table S5.** Monthly Air Quality Index (AQI US) values at all sites (Where i=indoor, o=outdoor, 1=first house, 2=second house).

| Location        | Site | 2022  |        |        |        |        |       | 2023   |        |        |       |        |        | Minimum | Maximum | Mean ± Standard Deviation |
|-----------------|------|-------|--------|--------|--------|--------|-------|--------|--------|--------|-------|--------|--------|---------|---------|---------------------------|
|                 |      | Jul   | Aug    | Sep    | Oct    | Nov    | Dec   | Jan    | Feb    | Mar    | Apr   | May    | Jun    |         |         |                           |
| Industrial area | 1i   | 73.95 | 100.06 | 124.56 | 151.43 | 173.22 | 178   | 167.1  | 147.96 | 101.84 | 57.69 | 48.96  | 71.655 | 48.96   | 177.96  | 116.37<br>±46.86          |
|                 | 1o   | 68.37 | 95.19  | 131.27 | 146.23 | 194.2  | 165.2 | 167.34 | 153.48 | 102.43 | 75.12 | 77.01  | 87.86  | 68.37   | 194.20  | 121.98<br>±42.82          |
|                 | 2i   | 55.52 | 73.14  | 105.73 | 130.95 | 172.47 | 161.2 | 146.34 | 121    | 59.28  | 34.85 | 21.94  | 63.975 | 21.94   | 172.47  | 95.53<br>±50.75           |
|                 | 2o   | 50.1  | 68.33  | 90     | 119.65 | 161.12 | 146   | 126.35 | 96.65  | 38.84  | 17.01 | 15.2   | 57.17  | 15.20   | 161.12  | 82.2<br>±45.98            |
| Commercial area | 1i   | 49.17 | 67.07  | 95.58  | 107.5  | 161.13 | 160.7 | 87.49  | 18.1   | 28.44  | 81.64 | 71.81  | 86.475 | 18.10   | 161.13  | 84.59<br>±44.32           |
|                 | 1o   | 58.04 | 79.84  | 98.03  | 121.47 | 104.31 | 134.9 | 72.98  | 145.66 | 49.89  | 3.58  | 5.19   | 53.75  | 3.58    | 145.66  | 77.30<br>±46.16           |
|                 | 2i   | 57.85 | 82.04  | 97.17  | 146.95 | 222.43 | 154.6 | 186.59 | 150.64 | 122.99 | 109.1 | 91.38  | 101.17 | 57.85   | 222.43  | 126.91<br>±47.04          |
|                 | 2o   | 52.49 | 67.49  |        |        | 141.22 | 161.7 | 142.37 | 103.52 | 91.32  | 96.93 | 71.36  | 98.395 | 52.49   | 161.67  | 102.68<br>±35.68          |
| Slum area       | 1i   | 82.71 | 94.92  | 136.99 | 192.81 | 229.87 | 221.5 | 208.41 | 212.87 | 153.16 | 125.8 | 96.88  | 109.02 | 82.71   | 229.87  | 155.41<br>±54.91          |
|                 | 1o   | 78.35 | 100.09 | 127.55 | 172.15 | 193.92 | 156.6 | 164.71 | 163.99 | 121.52 | 137.7 | 116.71 | 118.85 | 78.35   | 193.92  | 137.67<br>±33.33          |
|                 | 2i   | 76.69 | 88.72  | 117.72 | 150.39 | 186.78 | 184.3 | 187.14 | 183.79 | 145.29 | 106.8 | 112.69 | 112.86 | 76.69   | 187.14  | 137.77<br>±40.55          |

|                         |    |           |            |            |            |              |           |            |          |            |           |       |            |           |         |                  |
|-------------------------|----|-----------|------------|------------|------------|--------------|-----------|------------|----------|------------|-----------|-------|------------|-----------|---------|------------------|
|                         | 2o | 83.4<br>2 | 103.3<br>1 | 129.2      | 156.7<br>2 | 201.0<br>9   | 186.<br>6 | 183.5<br>2 | 153.95   | 112.8<br>4 | 94.5<br>1 | 92.3  | 114.3<br>7 | 83.42     | 201.09  | 134.32<br>±40.78 |
| High-income Colony      | 1i | 57.7<br>1 | 68.91      | 86.48      | 98.42      | 128.5<br>8   | 128.<br>5 | 140.9<br>8 | 114.12   | 63.56      | 55.8<br>7 | 70.58 | 79.15      | 55.87     | 140.98  | 91.07<br>±30.25  |
|                         | 1o | 58.2<br>2 | 77.38      | 92.3       | 115.5<br>3 | 160.6<br>1   | 151.<br>7 | 137.6<br>3 | 135.59   | 90         | 76.5<br>2 | 59.5  | 93.94<br>5 | 58.22     | 160.61  | 104.07<br>±35.31 |
|                         | 2i | 53.2<br>8 | 62.18      | 79.04      | 101.6<br>6 | 141.4<br>9   | 131.<br>5 | 140.7<br>7 | 135.52   | 89.26      | 65.9<br>4 | 62.79 | 90.87      | 53.28     | 141.49  | 96.2<br>±33.39   |
|                         | 2o | 62.2<br>9 | 84.65      | 101.2<br>6 | 125.2<br>4 | 171.8<br>7   | 165.<br>2 | 167.6<br>8 | 142.36   | 95.25      | 91.4<br>2 | 85.1  | 123.1<br>5 | 62.29     | 171.87  | 117.96<br>±37.02 |
|                         | 1i | 64.4<br>7 | 94.41      | 89.65      | 97.06      | 112.1<br>3   | 143.<br>5 | 157.5<br>6 | 158.47   | 116.3<br>4 | 87.3      | 75.23 | 73.22<br>5 | 64.47     | 158.47  | 105.78<br>±32.39 |
| Middle-income Colony    | 1o | 69.0<br>5 | 78.21      | 93.47      | 122.5<br>6 | 162.7<br>9   | 162.<br>6 | 163.4<br>5 | 144.51   | 99.4       | 79.4<br>4 | 76.1  | 109.6<br>2 | 69.05     | 163.45  | 113.43<br>±36.65 |
|                         | 2i | 93.6<br>8 | 101.9<br>4 | 100.0<br>1 | 129.3<br>4 | 152.1<br>9   | 148.<br>8 | 158.7<br>3 | 124.45   | 88.99      | 77.6<br>3 | 80.56 | 100.8<br>3 | 77.63     | 158.73  | 113.09<br>±28.6  |
|                         | 2o | 50.3<br>8 | 69.42      | 75.95      | 109.3<br>9 | 151.6<br>2   | 151.<br>7 | 158.7<br>7 | 134.32   | 88.5       | 67.1<br>2 | 59.64 | 79.33      | 50.38     | 158.77  | 99.68<br>±39.66  |
|                         | 1i | 70.4<br>1 | 100.6<br>7 | 103.2<br>3 | 119.1<br>3 | 156.5<br>6   | 150.<br>5 | 161.3<br>5 | 145.53   | 122.7<br>6 | 94.7<br>7 | 68.96 | 67.99      | 67.99     | 161.35  | 113.49<br>±34.63 |
| Low-income Colony       | 1o | 44.0<br>9 | 55.12      | 101.6<br>8 | 113.2<br>1 | 156.9<br>1   | 154.<br>6 | 158.9<br>5 | 133.49   | 99.2       | 80.7<br>8 | 73.62 | 93.26      | 44.09     | 158.95  | 105.41<br>±39.18 |
|                         | 2i | 36.7<br>4 | 45.74      | 75         | 106.0<br>9 | 155.5<br>3   | 144.<br>8 | 138.3<br>8 | 134.67   | 84.32      | 43.6<br>3 | 55.38 | 47.36      | 36.74     | 155.53  | 88.97<br>±44.82  |
|                         | 2o | 38        | 49.31      | 74.74      | 104.9<br>3 | 156.7<br>9   | 144.<br>5 | 140.5<br>1 | 113.82   | 69.76      | 43.5<br>8 | 43.04 | 57.82      | 38.00     | 156.79  | 86.40<br>±43.71  |
| Air Quality Index (AQI) |    |           | 0-50       | Good       | 51-100     | Satisfactory |           | 101-200    | Moderate | 201-300    | Poor      |       | 301-400    | Very Poor | 401-500 | Severe           |

Table S6. Microbial counts in November 2022.

| S.No. | Location             | Area        | Bacterial colony count (CFU/plate) | Fungal colony count (RB-PDA) (CFU/plate) |
|-------|----------------------|-------------|------------------------------------|------------------------------------------|
| 1.    | Industrial area      | Living area | 416                                | 28                                       |
|       |                      | Outdoor     | 157                                | 12                                       |
|       |                      | Kitchen     | 201                                | 19                                       |
|       |                      | Bedroom     | 181                                | 32                                       |
|       |                      | Bathroom    | 263                                | 25                                       |
| 2.    | High income colony   | Living area | 221                                | 31                                       |
|       |                      | Outdoor     | 283                                | 38                                       |
|       |                      | Kitchen     | 117                                | 24                                       |
|       |                      | Bedroom     | 189                                | 22                                       |
|       |                      | Bathroom    | 99                                 | 23                                       |
| 3.    | Slum arera           | Living area | 385                                | 71                                       |
|       |                      | Outdoor     | 348                                | 82                                       |
|       |                      | Kitchen     | 269                                | 45                                       |
|       |                      | Bedroom     | 307                                | 49                                       |
|       |                      | Bathroom    | 282                                | 82                                       |
| 4.    | Commercial area      | Living area | 251                                | 65                                       |
|       |                      | Outdoor     | 289                                | 92                                       |
|       |                      | Kitchen     | 165                                | 113                                      |
|       |                      | Bedroom     | 280                                | 56                                       |
|       |                      | Bathroom    | 186                                | 73                                       |
| 5.    | Middle income colony | Living area | 169                                | 30                                       |
|       |                      | Outdoor     | 182                                | 37                                       |
|       |                      | Kitchen     | 149                                | 27                                       |
|       |                      | Bedroom     | 117                                | 17                                       |
|       |                      | Bathroom    | 274                                | 27                                       |
| 6.    | Low income colony    | Living area | 54                                 | 11                                       |

|  |          |    |    |
|--|----------|----|----|
|  | Outdoor  | 76 | 29 |
|  | Kitchen  | 56 | 17 |
|  | Bedroom  | 31 | 10 |
|  | Bathroom | 68 | 25 |

**Table S7.** Microbial counts in February 2023.

| S.No. | Location             | Area        | Bacterial colony count<br>(CFU/plate) | Fungal colony count (RB-<br>PDA)<br>(CFU/plate) |
|-------|----------------------|-------------|---------------------------------------|-------------------------------------------------|
| 1.    | Industrial area      | Living area | 428                                   | 21                                              |
|       |                      | Outdoor     | 576                                   | 26                                              |
|       |                      | Kitchen     | 388                                   | 28                                              |
|       |                      | Bedroom     | 336                                   | 15                                              |
|       |                      | Bathroom    | 404                                   | 33                                              |
| 2.    | High income colony   | Living area | 76                                    | 19                                              |
|       |                      | Outdoor     | 216                                   | 32                                              |
|       |                      | Kitchen     | 103                                   | 17                                              |
|       |                      | Bedroom     | 51                                    | 20                                              |
|       |                      | Bathroom    | 68                                    | 23                                              |
| 3.    | Slum arera           | Living area | 336                                   | 61                                              |
|       |                      | Outdoor     | 364                                   | 81                                              |
|       |                      | Kitchen     | 288                                   | 55                                              |
|       |                      | Bedroom     | 344                                   | 39                                              |
|       |                      | Bathroom    | 284                                   | 42                                              |
| 4.    | Commercial area      | Living area | 348                                   | 21                                              |
|       |                      | Outdoor     | 366                                   | 49                                              |
|       |                      | Kitchen     | 472                                   | 35                                              |
|       |                      | Bedroom     | 224                                   | 24                                              |
|       |                      | Bathroom    | 316                                   | 25                                              |
| 5.    | Middle income colony | Living area | 216                                   | 9                                               |
|       |                      | Outdoor     | 392                                   | 41                                              |
|       |                      | Kitchen     | 192                                   | 10                                              |
|       |                      | Bedroom     | 152                                   | 12                                              |
|       |                      | Bathroom    | 132                                   | 23                                              |
| 6.    | Low income colony    | Living area | 127                                   | 76                                              |
|       |                      | Outdoor     | 248                                   | 128                                             |
|       |                      | Kitchen     | 178                                   | 76                                              |
|       |                      | Bedroom     | 152                                   | 83                                              |
|       |                      | Bathroom    | 488                                   | 89                                              |

**Table S8.** Microbial counts in May 2023.

| S.No. | Location        | Area        | Bacterial colony count<br>(CFU/plate) | Fungal colony count (RB-<br>PDA)<br>(CFU/plate) |
|-------|-----------------|-------------|---------------------------------------|-------------------------------------------------|
| 1.    | Industrial area | Living area | 76                                    | 8                                               |
|       |                 | Outdoor     | 193                                   | 1                                               |
|       |                 | Kitchen     | 63                                    | 4                                               |

|    |                      |             |     |    |
|----|----------------------|-------------|-----|----|
|    |                      | Bedroom     | 32  | 0  |
|    |                      | Bathroom    | 51  | 3  |
| 2. | High income colony   | Living area | 137 | 8  |
|    |                      | Outdoor     | 208 | 26 |
|    |                      | Kitchen     | 166 | 9  |
|    |                      | Bedroom     | 143 | 18 |
|    |                      | Bathroom    | 152 | 9  |
|    |                      |             |     |    |
| 3. | Slum arera           | Living area | 208 | 27 |
|    |                      | Outdoor     | 264 | 26 |
|    |                      | Kitchen     | 324 | 7  |
|    |                      | Bedroom     | 166 | 18 |
|    |                      | Bathroom    | 276 | 9  |
| 4. | Commercial area      | Living area | 163 | 19 |
|    |                      | Outdoor     | 167 | 24 |
|    |                      | Kitchen     | 112 | 12 |
|    |                      | Bedroom     | 127 | 11 |
|    |                      | Bathroom    | 118 | 8  |
| 5. | Middle income colony | Living area | 280 | 6  |
|    |                      | Outdoor     | 348 | 14 |
|    |                      | Kitchen     | 292 | 5  |
|    |                      | Bedroom     | 308 | 8  |
|    |                      | Bathroom    | 362 | 2  |
| 6. | Low income colony    | Living area | 126 | 3  |
|    |                      | Outdoor     | 264 | 15 |
|    |                      | Kitchen     | 187 | 5  |
|    |                      | Bedroom     | 106 | 7  |
|    |                      | Bathroom    | 144 | 6  |

Table S9. Microbial counts in July 2023.

| S. No. | Location           | Area        | Bacterial colony count (CFU/plate) | Fungal colony count (RB-PDA) (CFU/plate) |
|--------|--------------------|-------------|------------------------------------|------------------------------------------|
| 1.     | Industrial area    | Living area | TNTC                               | 9                                        |
|        |                    | Outdoor     | TNTC                               | 21                                       |
|        |                    | Kitchen     | TNTC                               | 15                                       |
|        |                    | Bedroom     | TNTC                               | 13                                       |
|        |                    | Bathroom    | TNTC                               | 12                                       |
| 2.     | High income colony | Living area | TNTC                               | 8                                        |
|        |                    | Outdoor     | TNTC                               | 19                                       |
|        |                    | Kitchen     | TNTC                               | 18                                       |
|        |                    | Bedroom     | TNTC                               | 13                                       |
|        |                    | Bathroom    | TNTC                               | 12                                       |
| 3.     | Slum arera         | Living area | TNTC                               | 36                                       |
|        |                    | Outdoor     | TNTC                               | 57                                       |
|        |                    | Kitchen     | TNTC                               | 18                                       |
|        |                    | Bedroom     | TNTC                               | 31                                       |
|        |                    | Bathroom    | TNTC                               | 53                                       |
| 4.     | Commercial area    | Living area | TNTC                               | 69                                       |
|        |                    | Outdoor     | TNTC                               | 65                                       |
|        |                    | Kitchen     | TNTC                               | 28                                       |
|        |                    | Bedroom     | 186                                | 28                                       |

|    |                             |             |      |    |
|----|-----------------------------|-------------|------|----|
| 5. | <b>Middle income colony</b> | Bathroom    | TNTC | 17 |
|    |                             | Living area | 192  | 7  |
|    |                             | Outdoor     | TNTC | 22 |
|    |                             | Kitchen     | TNTC | 7  |
|    |                             | Bedroom     | TNTC | 16 |
|    |                             | Bathroom    | TNTC | 5  |
| 6. | <b>Low income colony</b>    | Living area | TNTC | 7  |
|    |                             | Outdoor     | TNTC | 18 |
|    |                             | Kitchen     | 160  | 12 |
|    |                             | Bedroom     | TNTC | 3  |
|    |                             | Bathroom    | 216  | 7  |

\*TNTC- too numerous to count
